# Supplementary material for: Using Cluster Analysis to Overcome the Limits of Traditional Phenotype–Genotype Correlations: The Example of RYR1-Related Myopathies
Source: MDPI journal article supplement (doi:10.3390/genes14020298), 2023-01-23
Supplement: s1 [file s1]

## Legend to Supplemental material

**Figure S1:** Breakdown of muscle strength (measured using MRC scores) in various affected patients at the first and at the last available visit.

**Figure S2:** Stress plot of the nMDS model applied to clinical characteristics and biopsy findings of proband patients. The stress plot is a Shepard plot where ordination distances are plotted against the original sample's dissimilarities and the fit is shown as a monotone step line. The figure also shows two correlations as statistics of goodness of fit. The correlation based on stress (non-metric fit) is  $R^2 = 1 - S^2$ , where S is the final stress value of the model. The fit-based  $R^2$  is the correlation between the fitted values and ordination distances (linear fit).

**Figure S3:** Elbow method: the 4-cluster solution suggested. We used the k-means clustering algorithm and determined the optimal number of clusters by plotting the total within-cluster sum of squares for different numbers of clusters. The location of a bend (knee) in the plot is generally considered an indicator of the appropriate number of clusters.

**Figure S4:** The cluster analysis applied to RYR1-related cohorts with cores described in the recent literature [28–30].

**Table S1:** Clinical, histopathological, and genetic features of the sample. NA= not available, LGMW= limb girdle muscle weakness

**Table S2:** Clinical, histopathological, and genetic features of the familial cases. f=father; m=mother; s=son; si=sister, c=cousin, NA=not available, AD=autosomal dominant, n.k.=family relationship not known

**Table S3:** This table shows the distance of the clusters (in the nMDS model of the patients) from the clusters' centroids.
