# Supplementary material for: Using Cluster Analysis to Overcome the Limits of Traditional Phenotype–Genotype Correlations: The Example of RYR1-Related Myopathies
Source: Genes (Basel). 2023 Jan 23;14(2):298. doi: 10.3390/genes14020298 (PMC9956305; doi:10.3390/genes14020298)
Supplement: Supplementary file 1 [file genes-14-00298-s001.zip]

Archive with 8 entries (8 files):
- Figure S1 new.tif
- Figure S2.png
- Figure S3.png
- Figure S4.jpeg
- Legend to Supplementary material.pdf
- Table S1 rev_CD_200123.xlsx
- Table S2 rev_CD_200123.xlsx
- Table S3.tif
