# Supplementary material for: Using Cluster Analysis to Overcome the Limits of Traditional Phenotype–Genotype Correlations: The Example of RYR1-Related Myopathies
Source: Genes (Basel). 2023 Jan 23;14(2):298. doi: 10.3390/genes14020298 (PMC9956305; doi:10.3390/genes14020298)
Supplement: Supplementary file 1 [file genes-14-00298-s001.zip › Table S1 rev_CD_200123.xlsx]

## Sheet: Table S1
Cognome Nome	ID	Cluster	Sex/age	Serum CK (UI/L)	Clinical findings	Muscle biospy	RYR1 protein expression (% of controls)	Mutation cDNA level	Mutation protein level	Topology	CADD
lovato alessandro	Pt 1	1	M/42	normal	myalgia and exercise intolerance	undefined myopathic changes	NA	c.5339C>G	p.P1780R	Cytoplasmic	23.4
dal bosco maria	Pt 2	1	F/79	normal	distal muscle weakness in lower limbs	increased fiber size variation_undefined myopathic changes	NA	c.5030A>G	p.N1677S	Cytoplasmic	22.8
poerio vincenzo	Pt 3	1	M/62	NA	asymptomatic	undefined myopathic changes	NA	c.166-10C>T	splicing site		ND
								c.6731G>A	p.R2244Q	Cytoplasmic	26.4
CIMA Imerio	Pt 4	1	M/22	NA	asymptomatic	undefined myopathic changes	NA	c.6599C>T	p.A2200V	Cytoplasmic	21
								c.12886C>T	p.R4296W	Cytoplasmic	16.88
BENINI Cesare	Pt 5	/	M/73	500-1000	NA	NA	NA	c.1840C>T	p.R614C	Cytoplasmic	28.9
bravetti leonardo	Pt 6	1	M/16	<500	asymptomatic	increased fiber size variation_undefined myopathic changes	13.94	c.3646T>G	p.C1216G	Cytoplasmic	25.4
CRISTIANO Chiara	Pt 7	/	F/3	normal	axial muscle weakness	NA	NA	c.7025A>G	p.N2342S	Cytoplasmic	23.1
RUSCINITO Marco	Pt 8	1	M/48	<500	asymptomatic	undefined myopathic changes	NA	c.9674G>A	p.R3225Q	Cytoplasmic	26
CERELLA Federico	Pt 9	2	M/22	500-1000	asymptomatic	increased fiber size variation	NA	c.11941C>T	p.H3981Y	Cytoplasmic	28.8
ammirati alberto	Pt 10	2	M/21	>1000	myalgia and exercise intolerance	increased fiber size variation	NA	c.8888T>C	p.L2963P	Cytoplasmic	28.7
benedetti daniele	Pt 11	1	M/58	500-1000	asymptomatic	increased fiber size variation_increase in the number of fibers with internal nuclei_undefined myopathic changes	NA	c.7373G>A	p.R2458H	Cytoplasmic	29.8
pellegrini enza	Pt 12	2	F/55	<500	myalgia and exercise intolerance	increased fiber size variation_increase in the number of fibers with internal nuclei _multiple minicores	17.11	c.5036G>A	p.R1679H	Cytoplasmic	28.7
GALLO Gerardo	Pt 13	2	M/38	>1000	rhabdomyolysis	increased fiber size variation_increase in the number of fibers with internal nuclei	76.78	c.10729C>T	p.R3577W	Cytoplasmic	22.8
gibertini alfredo	Pt 14	1	M/13	500-1000	myalgia and exercise intolerance, myoglobinuria	increased fiber size variation_increase in the number of fibers with internal nuclei_undefined myopathic changes	100.71	c.6599C>T	p.A2200V	Cytoplasmic	21
Bensi Donatella	Pt 15	1	F/53	500-1000	LGMW	increased fiber size variation_increase in the number of fibers with internal nuclei _undefined myopathic changes	NA	c.14512C>G	p.L4838V	Cytoplasmic	28.4
melis martina	Pt 16	1	F/21	normal	proximal muscle weakness in upper and lower limbs	undefined myopathic changes	NA	c.4405C>T	p.R1469W	Cytoplasmic	33
								c.12044T>G	p.L4015R	Cytoplasmic	25.6
ginogi emiliano	Pt 17	4	M/12	normal	hypotonia	increased fiber size variation_type I fiber predominance	NA	c.14314A>G	p.I4772V	Cytoplasmic	22.5
								c.165+5G>A	splicing site		ND
Zardi Luca	Pt 18	4	M/27	>1000	LGMW, distal muscle weakness in lower limbs, myopathic face	multiple minicores_increased fiber size variation_mild increase in endomysial connective tissue _increase in the number of fibers with internal nuclei _type I fiber predominance	21.8639	c.6488 G>A	p.R2163H	Cytoplasmic	26.9
								c.14907T>G	p.H4969Q	Cytoplasmic	19.19
Idrissi Ghlimi Karim	Pt 19	4	M/15	NA	myopathic face, hypotonia, generalized muscle weakness, ophthalmoplegia	increase in the number of fibers with internal nuclei_mild increase in endomysial connective tissue	Not detected	c.6517C>T	p.Q2173X	Cytoplasmic	43
								c.8360C>G	p.T2787S	Cytoplasmic	21.2
Fiorin Chiara	Pt 20	4	F/26	normal	generalized muscle weakness, distal muscle weakness in upper and lower limbs	central core_increase in the number of fibers with internal nuclei _increased fiber size variation_mild increase in endomysial connective tissue	NA	c.14672G>A	p.G4891D	Pore-forming	32
								c.1690T>C	p.Y564H	Cytoplasmic	18.55
								c.2930C>T	p.T977M	Cytoplasmic	24.7
Fagone Sofia	Pt 21	4	F/13	normal	LGMW	central core_type I fiber predominance	NA	c.11708G>A	p.R3903Q	Cytoplasmic	33
								c.13892A>G	p.Y4631C	Lumenal	27.8
Ghibaudo Chiara	Pt 22	4	F/9	<500	hypotonia, muscle atrophy	central core	Not detected	c.1202G>A	p.R401H	Cytoplasmic	26.7
								c.10097G>A	p.R3366H	Cytoplasmic	23.9
								c.11798A>G	p.Y3933C	Cytoplasmic	24.1
Carè Federico	Pt 23	4	M/2	normal	generalized muscle atrophy, myopathic face	multiple minicores	NA	c.2938C>T	p.Q980X	Cytoplasmic	41
								c.7025A>G	p.N2342S	Cytoplasmic	23.1
ragni roberta	Pt 24	1	F/80	NA	orbicularis oris and buccinator muscle weakness	increased fiber size variation_mild increase in endomysial connective tissue _undefined myopathic changes	56.3	c.3128G>A	p.R1043H	Cytoplasmic	33
brunetti silvana	Pt 25	1	F/53	<500	LGMW	increased fiber size variation_increase in the number of fibers with internal nuclei _central core_type I fiber predominance	NA	c.13913G>A	p.G4638D	Transmenbrane Helical 2	32
fabellini andrea	Pt 26	3	M/15	500-1000	asymptomatic	multiple minicores	NA	c.7304G>T	p.R2435L	Cytoplasmic	25.7
hareem zenia	Pt 27	3	F/4	NA	hypotonia, generalized muscle weakness	increased fiber size variation_increase in the number of fibers with internal nuclei	NA	c.7654C>T	p.R2552C	Cytoplasmic	26.9
MONTEFIORE Adelina	Pt 28	4	F/64	normal	hypotonia	increased fiber size variation_increase in the number of fibers with internal nuclei _central core	NA	c.10097G>A	p.R3366H	Cytoplasmic	23.9
								c.11798A>G	p.Y3933C	Cytoplasmic	24.1
Marras Maria Antonietta	Pt 29	1	F/58	<500	proximal muscle weakness in upper limbs, distal muscle weakness in lower limbs	increased fiber size variation_undefined myopathic changes	NA	c.1696G>T	p.V566F	Cytoplasmic	24.9
Rullo Pietro	Pt 30	4	M/17	normal	hypotonia	increased fiber size variation_central core_type I fiber predominance	NA	c.4405C>T	p.R1469W	Cytoplasmic	26
								c.8460delA	p.E2820fs	Cytoplasmic	ND
CONI Nicolò	Pt 31	2	M/25	>1000	asymptomatic	increase in the number of fibers with internal nuclei	NA	c.1696G>T	p.V566F	Cytoplasmic	24.9
DESSI Aldo	Pt 32	3	M/54	500-1000	proximal muscle weakness in upper and lower limbs	increased fiber size variation_increase in the number of fibers with internal nuclei _type I fiber predominance _multiple minicores	NA	c.3748G>A	p.E1250K	Cytoplasmic	22.5
								c.14027A>G	p.K4676R	Cytoplasmic	27.4
SERRONI Rosina	Pt 33	3	F/82	normal	proximal muscle weakness in upper and lower limbs	central core_increased fiber size variation_mild increase in endomysial connective tissue	NA	c.13900G>A	p.E4634K	Transmenbrane Helical 2	31
simula saverio	Pt 34	2	M/28	>1000	myoglobinuria	increased fiber size variation_increase in the number of fibers with internal nuclei	NA	c.5288C>T	p.P1763L	Cytoplasmic	27.8
								c.7681C>T	p.L2561F	Cytoplasmic	23.3
pirrera stefano	Pt 35	1	M/50	normal	generalized muscle weakness	increased fiber size variation_undefined myopathic changes	NA	c.14111G>A	p.R4704Q	Cytoplasmic	29.5
Bartaloni valerio	Pt 36	/	M/49	normal	LGMW, proimal muscle weakness in upper limbs	NA	NA	c.14424C>A	p.F4808L	Cytoplasmic	26.5
gorecki Grzegorz Michael	Pt 37	1	M/43	500-1000	Rhabdomyolysis	undefined myopathic changes	NA	c.8327C>T	p.S2776F	Cytoplasmic	25.1
CECCHETTI Valter	Pt 38	/	M/64	normal	axial muscle weakness	NA	NA	c.1516G>A	p.A506T	Cytoplasmic	25.4
MANCO Rosario	Pt 39	2	M/47	500-1000	ptosis	increased fiber size variation_increase in the number of fibers with internal nuclei	NA	c.6349G>C	p.V2117L	Cytoplasmic	26.1
vivone giada	Pt 40	/	F/4	NA	LGMW	NA	NA	c.8417G>A	p.R2806H	Cytoplasmic	21.4
RICCI FRANCESCA	Pt 41	/	F/7	NA	myalgia and exercise intolerance	NA	NA	c.8417G>A	p.R2806H	Cytoplasmic	21.4
mogranzini lucas	Pt 42	4	M/4	<500	hypotonia	increased fiber size variation_type I fiber predominance _atrophy of type I fibers	NA	c.2122G>A	p.D708N	Cytoplasmic	34
								c.6721C>T	p.R2241X	Cytoplasmic	47
Milisanda Danilo Pio	Pt 43	1	M/14	<500	proximal and distal muscle weakness in lower limbs	increased fiber size variation_increase in the number of fibers with internal nuclei _undefined myopathic changes	57.8	c.1728C>G	p.I576M	Cytoplasmic	22.6
dal pont stefania	Pt 44	4	F/51	NA	proximal muscle weakness in lower limbs	central core	NA	c.14582G>A	p.R4861H	Lumenal	33
lazzarini monica	Pt 45	3	F/45	NA	proximal muscle weakness in lower limbs, distal muscle weaknessin in upper and lower limbs	central core	NA	c.9635A>G	p.E3212G	Cytoplasmic	24.7
								c.14396T>G	p.M4799R	Transmembrane Helical 3	26.3
zamparutti maria	Pt 46	1	F/55	<500	proximal muscle weakness in lower limbs	increased fiber size variation_type I fiber predominance _undefined myopathic changes	NA	c.6502G>A	p.V2168M	Cytoplasmic	24.1
poggi fabrizio	Pt 47	2	M/11	NA	generalized muscle weakness	increased fiber size variation_increase in the number of fibers with internal nuclei _mild increase in endomysial connective tissue	NA	c.8360G>G	p.T2787S	Cytoplasmic	21.2
ALBIANI Danilo	Pt 48	2	M/NA	500-1000	myalgia and exercise intolerance	normal	103.6	c.9796A>C	p.M3266L	Cytoplasmic	22
SCARAMELLA Federica	Pt 49	4	F/51	500-1000	axial muscle weakness	central core	NA	c.7522C>T	p.R2508C	Cytoplasmic	25.7
SANTORIELLO Rosa	Pt 50	4	F/83	500-1000	axial muscle weakness	central core	NA	c.11708G>A	p.R3903Q	Cytoplasmic	33
CIANFRIGLIA Agostino	Pt 51	/	M/56	500-1000	proximal muscle weakness in upper and lower limbs	NA	NA	c.7304G>T	p.R2435L	Cytoplasmic	25.5
di nolfo stefano	Pt 52	2	M/41	>1000	myalgia and exercise intolerance, myoglobinuria	increased fiber size variation_increase in the number of fibers with internal nuclei _undefined myopathic changes_undefined myopathic changes	NA	c.7048G>A	p.A2350T	Cytoplasmic	25.5
SPITALIERI Simone	Pt 53	3	M/47	normal	axial muscle weakness, proximal muscle weakness in uppper limbs	multiple minicores	NA	c.3866G>A	p.R1289Q	Cytoplasmic	29
LA PERNA Federica	Pt 54	4	F/46	normal	muscle weakness in upper limbs, proximal muscle weakness in lower limbs	central core_increase in the number of fibers with internal nuclei	NA	c.14678G>A	p.R4893Q	Pore-forming	33
VELLUTI Nazareno	Pt 55	/	M/59	<500	distal muscle weakness in lower limbs, myalgia and exercise intolerance	NA	NA	c.13513G>C	p.D4505H	Cytoplasmic	24.3
GENTILE Manuela	Pt 56	2	F/58	500-1000	myalgia and exercise intolerance	increased fiber size variation	NA	c.8603C>T	p.S2868F	Cytoplasmic	23.4
FERRINI Gianni	Pt 57	2	M/60	<500	muscle weakness in upper limbs, myalgia and exercise intolerance	increased fiber size variation	NA	c.10616G>A	p.R3539H	Cytoplasmic	28.3
CASADEI Mario	Pt 58	2	M/66	500-1000	proximal muscle weakness in lower limbs, myalgia and exercise intolerance	increased fiber size variation_increase in the number of fibers with internal nuclei	NA	c.7025 A>G	p.N2342S	Cytoplasmic	23.1
VALERI Roberta	Pt 59	2	F/64	>1000	myalgia and exercise intolerance	increased fiber size variation_increase in the number of fibers with internal nuclei	NA	c.14477C>T	p.T4826I	Cytoplasmic	28
LEONI Simonetta	Pt 60	2	F/60	<500	proximal muscle weakness in lower limbs, orbicularis oris muscle weakness	increased fiber size variation_increase in the number of fibers with internal nuclei_mild increase in endomysial connective tissue	NA	c.97A>G	p.K33E	Cytoplasmic	26.6
Sarcinella Sergio	Pt 61	1	M/42	>1000	LGMW, Rhabdomyolysis and myoglobinuria	increased fiber size variation_increase in the number of fibers with internal nuclei	NA	c.13694T>G	p.F4565C	Transmenbrane Helical 1	32
QUATRANA Paolo	Pt 62	4	M/NA	normal	generalized muscle weakness	increased fiber size variation_increase in the number of fibers with internal nuclei_type I fiber predominance	NA	c.10347+1G>A	splicing site		ND
								c.14918C>T	p.P4973L	Cytoplasmic	25
								c.10347+1G>A	splicing site		ND
Capozzi Ermelinda	Pt 63	3	F/56	>1000	proximal muscle weakness in upper and lower limbs	increased fiber size variation_multiple minicores	91.03	c.11708G>A	p.R3903Q	Cytoplasmic	33
Cirillo Antonio	Pt 64	1	M/25	>1000	rhabdomyolysis	increased fiber size variation_multiple minicores_type I fiber predominance _undefined myopathic changes	93.25	c.2996G>A	p.R999H	Cytoplasmic	27
Corsini Anna	Pt 65	3	F/67	<500	proximal muscle weakness in lower limbs	increased fiber size variation_multiple minicores_type I fiber predominance	93.47	c.1487A>G	p.Y496C	Cytoplasmic	26.9
Garzia Silvana	Pt 66	/	F/74	<500	proximal muscle weakness in lower limbs	NA	NA	c.6349G>C	p.V2117L	Cytoplasmic	26.1
Giarletta Vincenzo Aniello	Pt 67	3	M/59	>1000	proximal muscle weakness in upper and lower limbs	increased fiber size variation	86.42	c.12563G>A	p.R4188H	Cytoplasmic	26.3
Manfellotti Aniello	Pt 68	3	M/54	>1000	proximal muscle weakness in upper and lower limbs	increased fiber size variation_multiple minicores	106.75	c.11708G>A	p.R3903Q	Cytoplasmic	33
Moretti Gilda	Pt 69	3	F/71	500-1000	proximal and distal muscle weakness in upper and lower limbs	increased fiber size variation_multiple minicores	68.06	c.2693A>T	p.D898V	Cytoplasmic	26.9
Policane Alfredo	Pt 70	3	M/58	>1000	proximal muscle weakness in upper and lower limbs and axial muscle weakness	increased fiber size variation_multiple minicores_undefined myopathic changes	34.39	c.14901C>G	p.D4967E	Cytoplasmic	22.1
Carratù Alessia	Pt 71	4	F/10	NA	axial muscle weakness	central core_increased fiber size variation_mild increase in endomysial connective tissue_increase in the number of fibers with internal nuclei	NA	c.6178G>T	p.G2060C	Cytoplasmic	13.64
								c.13691G>A	p.R4564Q	Transmenbrane Helical 1	33
Casiraghi Francesca	Pt 72	4	F/37	<500	LGMW	increased fiber size variation_increase in the number of fibers with internal nuclei_type I fiber predominance	NA	c.4711A>G	p.I1571V	Cytoplasmic	15.28
								c.1925G>C	p.S642T	Cytoplasmic	32
								c.11798A>G	p.Y3933C	Cytoplasmic	24.1
Leto nicodemo	Pt 73	2	M/31	500-1000	asymptomatic	increase in the number of fibers with internal nuclei	NA	c.4711A>G	p.I1571V	Cytoplasmic	15.28
								c.10097G>A	p.R3366H	Cytoplasmic	23.9
								c.11798A>G	p.Y3933C	Cytoplasmic	24.1
	LGMW: limb girdle muscle weakness
