# Supplementary material for: Using Cluster Analysis to Overcome the Limits of Traditional Phenotype–Genotype Correlations: The Example of RYR1-Related Myopathies
Source: Genes (Basel). 2023 Jan 23;14(2):298. doi: 10.3390/genes14020298 (PMC9956305; doi:10.3390/genes14020298)
Supplement: Supplementary file 1 [file genes-14-00298-s001.zip › Table S2 rev_CD_200123.xlsx]

## Sheet: families
Cognome Nome	ID	Cluster	Sex/age	Serum CK	Clinical findings	Muscle biopsy	RYR1 protein expression (% of controls)	Mutation cDNA level	Mutation protein level	Topology	CADD	Inheritance
bravetti leonardo	Pt 6	1	M/16	<500	asymptomatic	increased fiber size variation	13.94	c.3646T>G	p.C1216G	Cytoplasmic	25.4	AD
bravetti valentino	Pt 6 si		M/13	<500	myalgia and exercise intolerance	NA	NA	c.3646T>G	p.C1216G	Cytoplasmic		AD
bravetti andrea	Pt 6 f		M/49	500-1000	asymptomatic	increased fiber size variation_increase in the number of fibers with internal nuclei	45.36	NA	NA			AD
CERELLA Federico	Pt 9	1	M/22	500-1000	asymptomatic	increased fiber size variation	NA	c.11941C>T	p.H3981Y	Cytoplasmic	28.8	AD
Cerella Asya	Pt 9 si		F/18	normal	asymptomatic	NA	NA	NA	NA			AD
Gronchi Silvia	Pt 9 m		F/45	<500	proximal muscle weakness in lower limbs, myalgia and exercise intolerance	increased fiber size variation_undefined myopathic changes	Not detected	NA	NA			AD
ammirati alberto	Pt 10	2	M/21	>1000	myalgia and exercise intolerance	increased fiber size variation	NA	c.8888T>C	p.L2963P	Cytoplasmic	28.7	AD
ammirati livia	Pt 10 si		F/15	normal	asymptomatic	NA	NA	NA	NA			AD
paoli beatrice	Pt 10 m		F/52	normal	myalgia	NA	NA	NA	NA			AD
benedetti daniele	Pt 11	1	M/58	500-1000	asymptomatic	increased fiber size variation_increase in the number of fibers with internal nuclei	NA	c.7373G>A	p.R2458H	Cytoplasmic	29.8	AD
benedetti andrea	Pt 11 s		M/13	normal	asymptomatic	NA	NA	NA	NA			AD
benedetti riccardo	Pt 11 s		M/20	NA	exercise intolerance	NA	NA	NA	NA			AD
pellegrini enza	Pt 12	2	F/55	<500	myalgia and exercise intolerance	increased fiber size variation_increase in the number of fibers with internal nuclei_multiple minicores	17.15	c.5036G>A	p.R1679H	Cytoplasmic	28.7	AD
di marte leonardo	Pt 12 s		M/34	500-1000	asymptomatic	increased fiber size variation_increase in the number of fibers with internal nuclei _multiple minicores	86.98	NA	NA			AD
di marte alessio	Pt 12 s		M/6	normal	asymptomatic	NA	NA	NA	NA			AD
gibertini alfredo	Pt 14	2	M/13	500-1000	myalgia and exercise intolerance, myoglobinuria	increased fiber size variation_increase in the number of fibers with internal nuclei	100.71	c.6599C>T	p.A2200V	Cytoplasmic	21.0	AD
gibertini VA	Pt 14 f		M/47	<500	proximal muscle weakness in lower limbs, myalgia and exercise intolerance	increased fiber size variation_undefined myopathic changes	45.50	NA	NA			AD
gibertini francesca	Pt 14 si		M/19	normal	proximal muscle weakness in lower limbs, myalgia and exercise intolerance	NA	NA	NA	NA			AD
SCARAMELLA Federica	Pt 49	3	F/51	500-1000	axial muscle weakness	central core	NA	c.7522C>T	p.R2508C	Cytoplasmic	25.7	AD
SCARAMELLA Antonio	Pt 49 f		M/85	500-1000	proximal muscle weakness	NA	NA	c.7522C>T	p.R2508C	Cytoplasmic		AD
IENNE Paola (Fam. Scaramella)	Pt 49 n.k.		F/63	500-1000	axial muscle weakness	NA	NA	c.7522C>T	p.R2508C	Cytoplasmic		AD
RENZI David (Fam. Scaramella)	Pt 49 n.k.		M/36	normal	asymptomatic	NA	NA	c.7522C>T	p.R2508C	Cytoplasmic		AD
CIANFRIGLIA Agostino	Pt 51	/	M/56	500-1000	proximal muscle weakness in upper and lower limbs	NA	NA	c.7304G>T	p.R2435L	Cytoplasmic	25.5	AD
CIANFRIGLIA Matteo	Pt 51 s		M/21	500-1000	proximal muscle weakness	NA	NA	c.7304G>T	p.R2435L	Cytoplasmic		AD
LA PERNA Federica ( Con Ambrosini)	Pt 54	3	F/46	normal	muscle weakness in upper limbs, proximal muscle weakness in lower limbs	central core_increase in the number of fibers with internal nuclei	NA	c.14678G>A	p.R4893Q	Pore-forming	33.0	AD
AMBROSINI Marcella (CON La Perna)	Pt 54 n.k.		F/61	NA	proximal muscle weakness in lower limbs	NA	NA	c.14678G>A	p.R4893Q	Pore-forming		AD
VELLUTI Nazareno (padre)	Pt 55	/	M/59	<500	distal muscle weakness in lower limbs, myalgia and exercise intolerance	NA	NA	c.13513G>C	p.D4505H	Cytoplasmic	24.3	AD
TOMASSI Valentina (nonna paterna)	Pt 55 m		F/NA	NA	asymptomatic	NA	NA	c.13513G>C	p.D4505H	Cytoplasmic		AD
VELLUTI Damiano (figlio)	Pt 55 s		M/NA	>1000	asymptomatic	NA	NA	c.13513G>C	p.D4505H	Cytoplasmic		AD
GENTILE Manuela	Pt 56	2	F/58	500-1000	myalgia and exercise intolerance	increased fiber size variation	NA	c.8603 C>T	p.S2868F	Cytoplasmic	23.4	AD
GENTILE Nello (padre Manuela)	Pt 56 f		M/NA	500-1000	asymptomatic	NA	NA	NA	NA			AD
GENTILE Stefano (fratello Manuela)	Pt 56 si		M/54	<500	myalgia	NA	NA	c.8603 C>T	p.S2868F	Cytoplasmic		AD
BINI Mattia (figlio di Gentile Manuela)	Pt 56 s		M/27	500-1000	asymptomatic	NA	NA	c.8603 C>T	p.S2868F	Cytoplasmic		AD
FERRINI Gianni	Pt 57	2	M/60	<500	muscle weakness in upper limbs, myalgia and exercise intolerance	increased fiber size variation	NA	c.10616 G>A	p.R3539H	Cytoplasmic	28.3	AD
FERRINI Valentina	Pt 57 n.k.		F/unknown	<500	asymptomatic	NA	NA	NA	NA			AD
madre di Gianni	Pt 57 m		F/unknown	<500	asymptomatic	NA	NA	NA	NA			AD
CASADEI Mario	Pt 58	2	M/66	500-1000	proximal muscle weakness in lower limbs, myalgia and exercise intolerance	increased fiber size variation_increase in the number of fibers with internal nuclei	NA	c.7025 A>G	p.N2342S	Cytoplasmic	23.1	AD
CASADEI Lorenzo (figlio)	Pt 58 s		M/31	<500	asymptomatic	NA	NA	NA	NA			AD
Capozzi Ermelinda	Pt 63	3	F/56	>1000	proximal muscle weakness in upper and lower limbs	increased fiber size variation_multiple minicores	91.03	c.11708G>A	p.R3903Q	Cytoplasmic	33.0	AD
Ferragamo Elisa	Pt 63 s		F/26	<500	asymptomatic	NA	NA	c.11708G>A	p.R3903Q	Cytoplasmic		AD
Ferragamo Nicola	Pt 63 s		F/28	<500	asymptomatic	NA	NA	c.11708G>A	p.R3903Q	Cytoplasmic		AD
Cirillo Antonio	Pt 64	1	M/25	>1000	rhabdomyolysis	increased fiber size variation_multiple minicores_type I fiber predominance _undefined myopathic changes	93.25	c.2996G>A	p.R999H	Cytoplasmic	27.0	AD
Cirillo Ferruccio	Pt 64 f		M/52	<500	asymptomatic	NA	NA	c.2996G>A	p.R999H	Cytoplasmic		AD
Garzia Silvana	Pt 66	3	F/74	<500	proximal muscle weakness in lower limbs	NA	NA	c.6349G>C	p.V2117L	Cytoplasmic	26.1	AD
Pernicola Raffaele	Pt 66 s		M/47	<500	proximal muscle weakness in lower limbs	NA	NA	c.6349G>C	p.V2117L	Cytoplasmic		AD
Giarletta Vincenzo Aniello	Pt 67	3	M/59	>1000	proximal muscle weakness in upper and lower limbs	increased fiber size variation	86.42	c.12563G>A	p.R4188H	Cytoplasmic	26.3	AD
Giarletta Andrea	Pt 67 s		M/36	<500	proximal muscle weakness in lower limbs, exercise intolerance	increased fiber size variation_multiple minicores	109.14	NA	NA			AD
Giarletta Antonio	Pt 67 s		M/34	<500	proximal muscle weakness in lower limbs, exercise intolerance	NA	NA	c.12563G>A	p.R4188H	Cytoplasmic	26.3	AD
